# Supplementary material for: Impact of Short-Term Exposure to Extreme Temperatures on Mortality: A Multi-City Study in Belgium
Source: MDPI journal article supplement (doi:10.3390/ijerph19073763), 2022-03-22
Supplement: s1 [file s1]

# Impact of short-term exposure to extreme temperatures on mortality: a multi-city study in Belgium

## Supplementary Material

### Table of Contents

|                                                                                                                                                                                                                                                                                                                                                       |          |
|-------------------------------------------------------------------------------------------------------------------------------------------------------------------------------------------------------------------------------------------------------------------------------------------------------------------------------------------------------|----------|
| <b>TABLES .....</b>                                                                                                                                                                                                                                                                                                                                   | <b>2</b> |
| Table S1. Cold effect (1 <sup>st</sup> and 5 <sup>th</sup> percentiles of temperature versus minimum-mortality temperature) and heat effect (95 <sup>th</sup> and 99 <sup>th</sup> percentiles of temperature versus minimum-mortality temperature) of temperature on mortality cumulated over lags of 0–21 days, 2010-2015 .....                     | 2        |
| Table S2. Cold effect (1 <sup>st</sup> and 5 <sup>th</sup> percentiles of temperature versus minimum-mortality temperature) and heat effect (95 <sup>th</sup> and 99 <sup>th</sup> percentiles of temperature versus minimum-mortality temperature) of temperature on mortality cumulated over lags of 0-7, 0-14, 0-21 and 0-28 days, 2010-2015 ..... | 3        |
| <b>FIGURES .....</b>                                                                                                                                                                                                                                                                                                                                  | <b>4</b> |
| Figure S1. Agglomeration-specific and pooled overall temperature-mortality associations cumulated over lags of 0-7 days, 2010-2015.....                                                                                                                                                                                                               | 4        |
| Figure S2. Agglomeration-specific and pooled overall temperature-mortality associations cumulated over lags of 0-14 days, 2010-2015.....                                                                                                                                                                                                              | 5        |
| Figure S3. Agglomeration-specific and pooled overall temperature-mortality associations cumulated over lags of 0-28 days, 2010-2015.....                                                                                                                                                                                                              | 6        |
| Figure S4. Pooled overall cumulative temperature-mortality associations by sex in people ≥ 85 years, cumulated over lags of 0-7 days, 2010-2015.....                                                                                                                                                                                                  | 7        |

## Tables

Table S1. Cold effect (1<sup>st</sup> and 5<sup>th</sup> percentiles of temperature versus minimum-mortality temperature) and heat effect (95<sup>th</sup> and 99<sup>th</sup> percentiles of temperature versus minimum-mortality temperature) of temperature on mortality cumulated over lags of 0–21 days, 2010-2015

|                                 | Deaths         | RR (95% CI) <sup>a</sup>             |                                     |                                       |                                       |
|---------------------------------|----------------|--------------------------------------|-------------------------------------|---------------------------------------|---------------------------------------|
|                                 |                | Cold effect                          |                                     | Heat effect                           |                                       |
|                                 | n (%)          | p <sub>1</sub> (-1.7°C) <sup>b</sup> | p <sub>5</sub> (2.3°C) <sup>b</sup> | p <sub>95</sub> (26.7°C) <sup>b</sup> | p <sub>99</sub> (31.3°C) <sup>b</sup> |
| Age                             |                |                                      |                                     |                                       |                                       |
| < 65 years                      | 44,024 (14.3)  | 1.10 (0.88-1.36)                     | 1.16 (0.96-1.39)                    | 1.11 (1.05-1.17)                      | 1.46 (1.19-1.78)                      |
| 65-74 years                     | 45,166 (14.7)  | 1.12 (0.80-1.57)                     | 1.15 (0.99-1.33)                    | 1.01 (0.94-1.08)                      | 1.07 (0.75-1.51)                      |
| 75-84 year                      | 92,248 (30.0)  | 1.34 (1.16-1.54)                     | 1.26 (1.17-1.35)                    | 1.03 (0.99-1.07)                      | 1.15 (0.97-1.36)                      |
| ≥ 85 years                      | 126,421 (41.1) | 1.44 (1.25-1.65)                     | 1.33 (1.22-1.46)                    | 1.01 (0.96-1.07)                      | 1.15 (0.90-1.48)                      |
| Sex                             |                |                                      |                                     |                                       |                                       |
| Male                            | 146,095 (47.5) | 1.30 (1.18-1.44)                     | 1.21 (1.14-1.28)                    | 1.02 (0.98-1.05)                      | 1.10 (0.92-1.31)                      |
| Female                          | 161,764 (52.5) | 1.32 (1.16-1.49)                     | 1.30 (1.19-1.42)                    | 1.05 (1.01-1.10)                      | 1.29 (1.11-1.50)                      |
| Education                       |                |                                      |                                     |                                       |                                       |
| low                             | 87,502 (28.4)  | 1.21 (1.01-1.46)                     | 1.28 (1.14-1.44)                    | 1.02 (0.98-1.07)                      | 1.21 (0.99-1.47)                      |
| high                            | 69,069 (22.4)  | 1.55 (1.16-2.07)                     | 1.37 (1.11-1.69)                    | 1.02 (0.94-1.10)                      | 1.24 (0.99-1.55)                      |
| % built-up area                 |                |                                      |                                     |                                       |                                       |
| low                             | 71,950 (23.4)  | 1.51 (1.27-1.79)                     | 1.32 (1.19-1.47)                    | 1.03 (0.95-1.11)                      | 1.23 (0.92-1.65)                      |
| high                            | 81,140 (26.4)  | 1.28 (1.05-1.55)                     | 1.19 (1.05-1.34)                    | 1.07 (1.02-1.13)                      | 1.41 (1.17-1.70)                      |
| Municipality of death=residence | 192,912 (62.7) | 1.28 (1.12-1.46)                     | 1.24 (1.15-1.33)                    | 1.03 (0.99-1.07)                      | 1.15 (0.99-1.34)                      |
| Adjustment for humidity         |                |                                      |                                     |                                       |                                       |
|                                 | lag 1 day      | 1.34 (1.23-1.47)                     | 1.27 (1.19-1.35)                    | 1.04 (1.01-1.07)                      | 1.22 (1.08-1.36)                      |
|                                 | lag 3 days     | 1.37 (1.26-1.49)                     | 1.29 (1.22-1.36)                    | 1.03 (1.00-1.06)                      | 1.21 (1.08-1.35)                      |

<sup>a</sup> RR: relative risks and their 95% confidence intervals for temperature versus minimum mortality temperature (i.e. 23.1 °C). RR were calculated from the agglomeration-specific overall cumulative associations between temperature and mortality (lag of 0-21 days)

<sup>b</sup> p: percentile of the temperature distribution and the corresponding temperature in Celsius degrees

Table S2. Cold effect (1<sup>st</sup> and 5<sup>th</sup> percentiles of temperature versus minimum-mortality temperature) and heat effect (95<sup>th</sup> and 99<sup>th</sup> percentiles of temperature versus minimum-mortality temperature) of temperature on mortality cumulated over lags of 0-7, 0-14, 0-21 and 0-28 days, 2010-2015

| RR <sup>a</sup> (95% CI) |     |                |                  |                                      |                                     |                                       |                                       |  |
|--------------------------|-----|----------------|------------------|--------------------------------------|-------------------------------------|---------------------------------------|---------------------------------------|--|
|                          |     | k <sup>b</sup> | MMT <sup>c</sup> |                                      | Cold effect                         |                                       | Heat effect                           |  |
| Lag period               | t l | T (°C)         | p <sup>d</sup>   | p <sub>1</sub> (-1.7°C) <sup>d</sup> | p <sub>5</sub> (2.3°C) <sup>d</sup> | p <sub>95</sub> (26.7°C) <sup>d</sup> | p <sub>99</sub> (31.3°C) <sup>d</sup> |  |
| Main analysis            |     |                |                  |                                      |                                     |                                       |                                       |  |
| 0-7 days                 | 3 1 | 21.0           | 78.0             | 1.05 (1.01-1.09)                     | 1.07 (1.03-1.11)                    | 1.08 (1.06-1.11)                      | 1.33 (1.24-1.43)                      |  |
| 0-14 days                | 3 2 | 22.1           | 82.5             | 1.17 (1.11-1.24)                     | 1.16 (1.11-1.21)                    | 1.06 (1.04-1.09)                      | 1.29 (1.19-1.41)                      |  |
| 0-21 days                | 3 2 | 23.1           | 86.3             | 1.32 (1.21-1.44)                     | 1.26 (1.19-1.34)                    | 1.04 (1.01-1.07)                      | 1.21 (1.08-1.36)                      |  |
| 0-28 days                | 3 2 | 23.9           | 88.8             | 1.47 (1.32-1.63)                     | 1.33 (1.24-1.43)                    | 1.02 (0.99-1.06)                      | 1.18 (1.03-1.35)                      |  |
| Sensitivity analysis     |     |                |                  |                                      |                                     |                                       |                                       |  |
| 0-7 days                 | 5 3 | 21.6           | 80.5             | 1.05 (1.01-1.10)                     | 1.10 (1.05-1.15)                    | 1.07 (1.02-1.12)                      | 1.33 (1.24-1.42)                      |  |
| 0-14 days                | 5 4 | 23.1           | 86.3             | 1.16 (1.09-1.24)                     | 1.22 (1.15-1.30)                    | 1.04 (0.99-1.09)                      | 1.31 (1.20-1.42)                      |  |
| 0-21 days                | 5 4 | 25.7           | 93.2             | 1.29 (1.16-1.43)                     | 1.33 (1.23-1.43)                    | 1.01 (0.98-1.03)                      | 1.26 (1.11-1.44)                      |  |
| 0-28 days                | 5 4 | 25.9           | 93.6             | 1.44 (1.25-1.65)                     | 1.43 (1.30-1.57)                    | 1.00 (0.98-1.02)                      | 1.27 (1.07-1.52)                      |  |

<sup>a</sup> RR: relative risks and their 95% confidence intervals for temperature versus minimum mortality temperature. RR were calculated from the agglomeration-specific overall cumulative associations between temperature and mortality

<sup>b</sup> k: number of internal knots for the temperature (t) and lag (l) dimensions of the crossbasis function in the distributed lag non-linear models

<sup>c</sup> MMT: overall and agglomeration, specific minimum mortality temperatures with their corresponding percentiles

<sup>d</sup> p: percentile of the temperature distribution and corresponding temperature in Celsius degrees T (°C)

## Figures

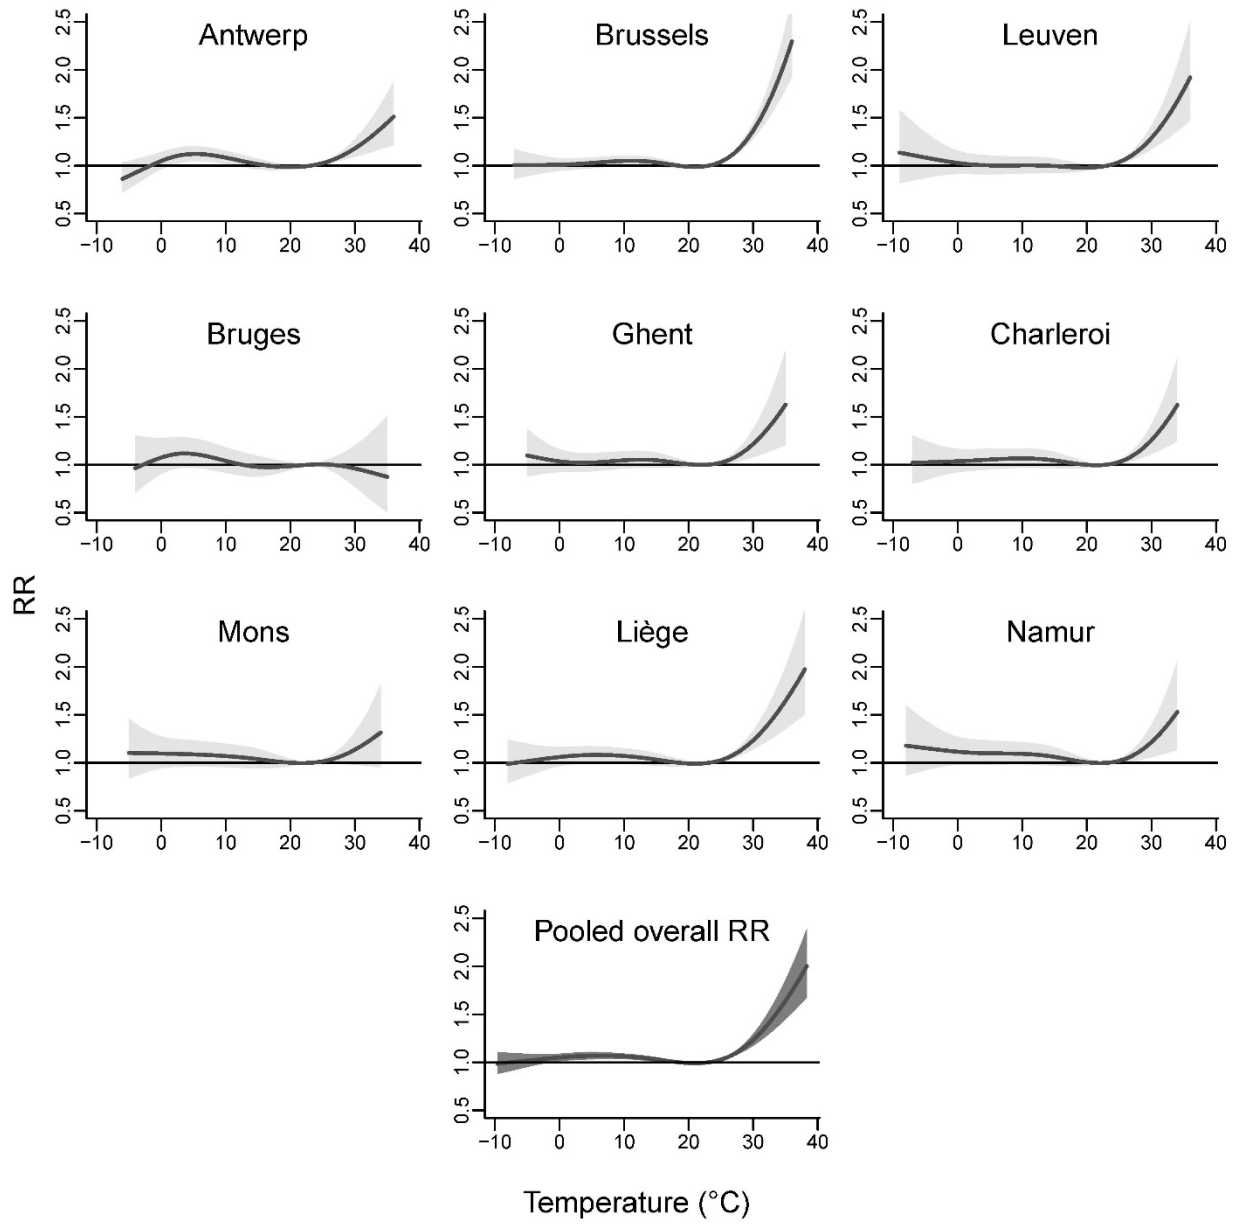

Figure S1. Agglomeration-specific and pooled overall temperature-mortality associations cumulated over lags of 0-7 days, 2010-2015

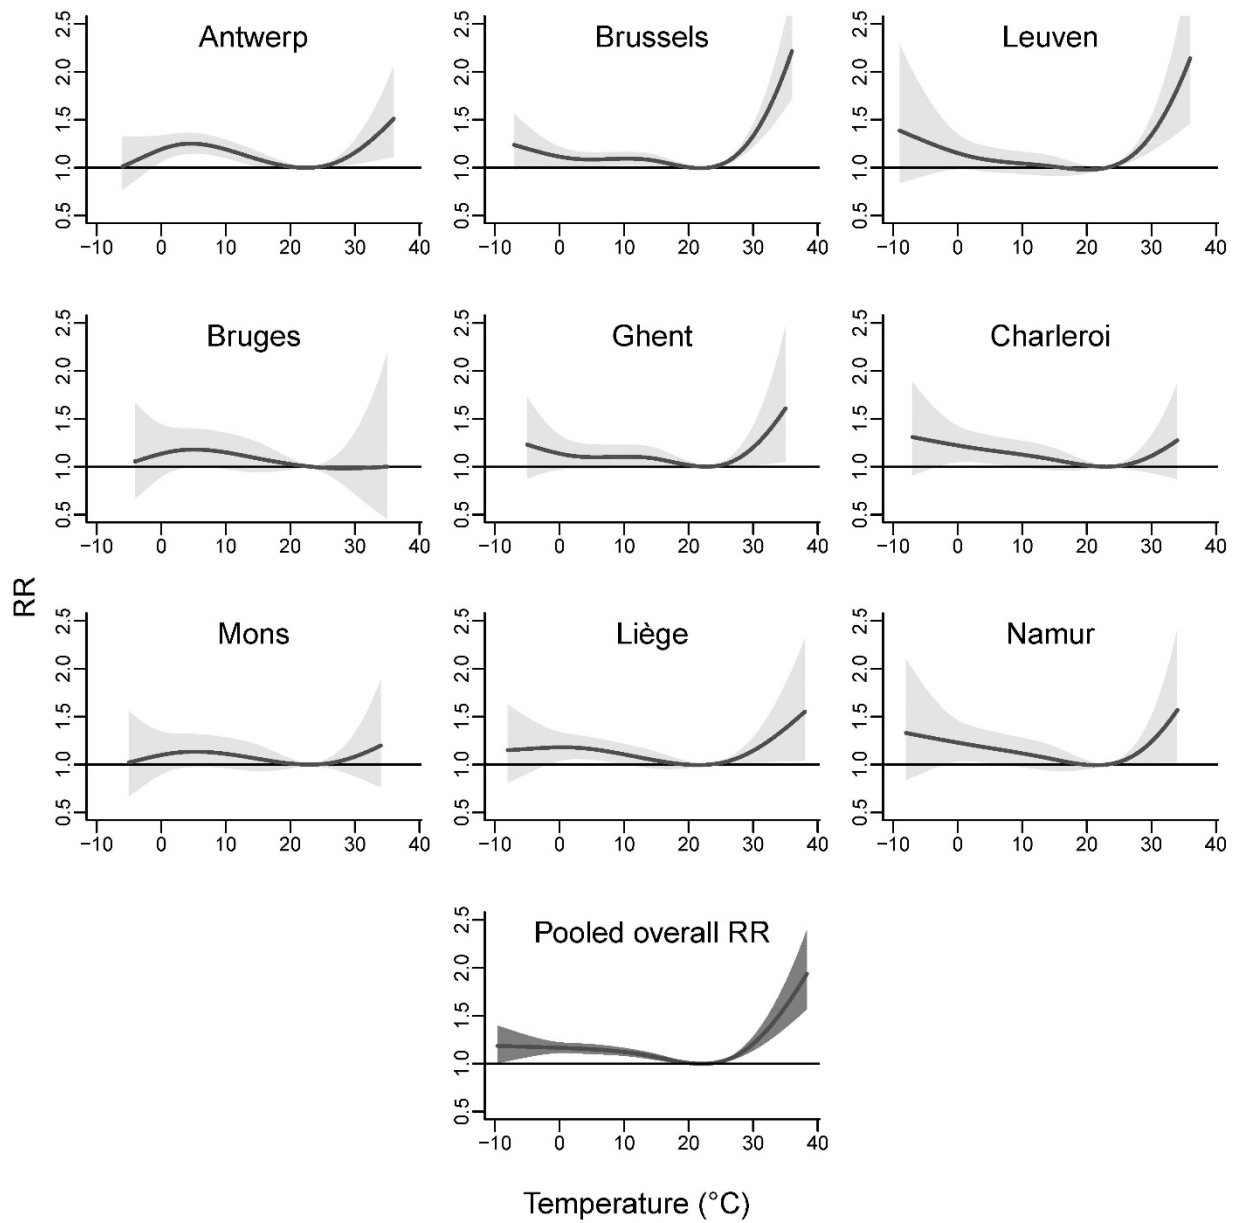

Figure S2. Agglomeration-specific and pooled overall temperature-mortality associations cumulated over lags of 0-14 days, 2010-2015

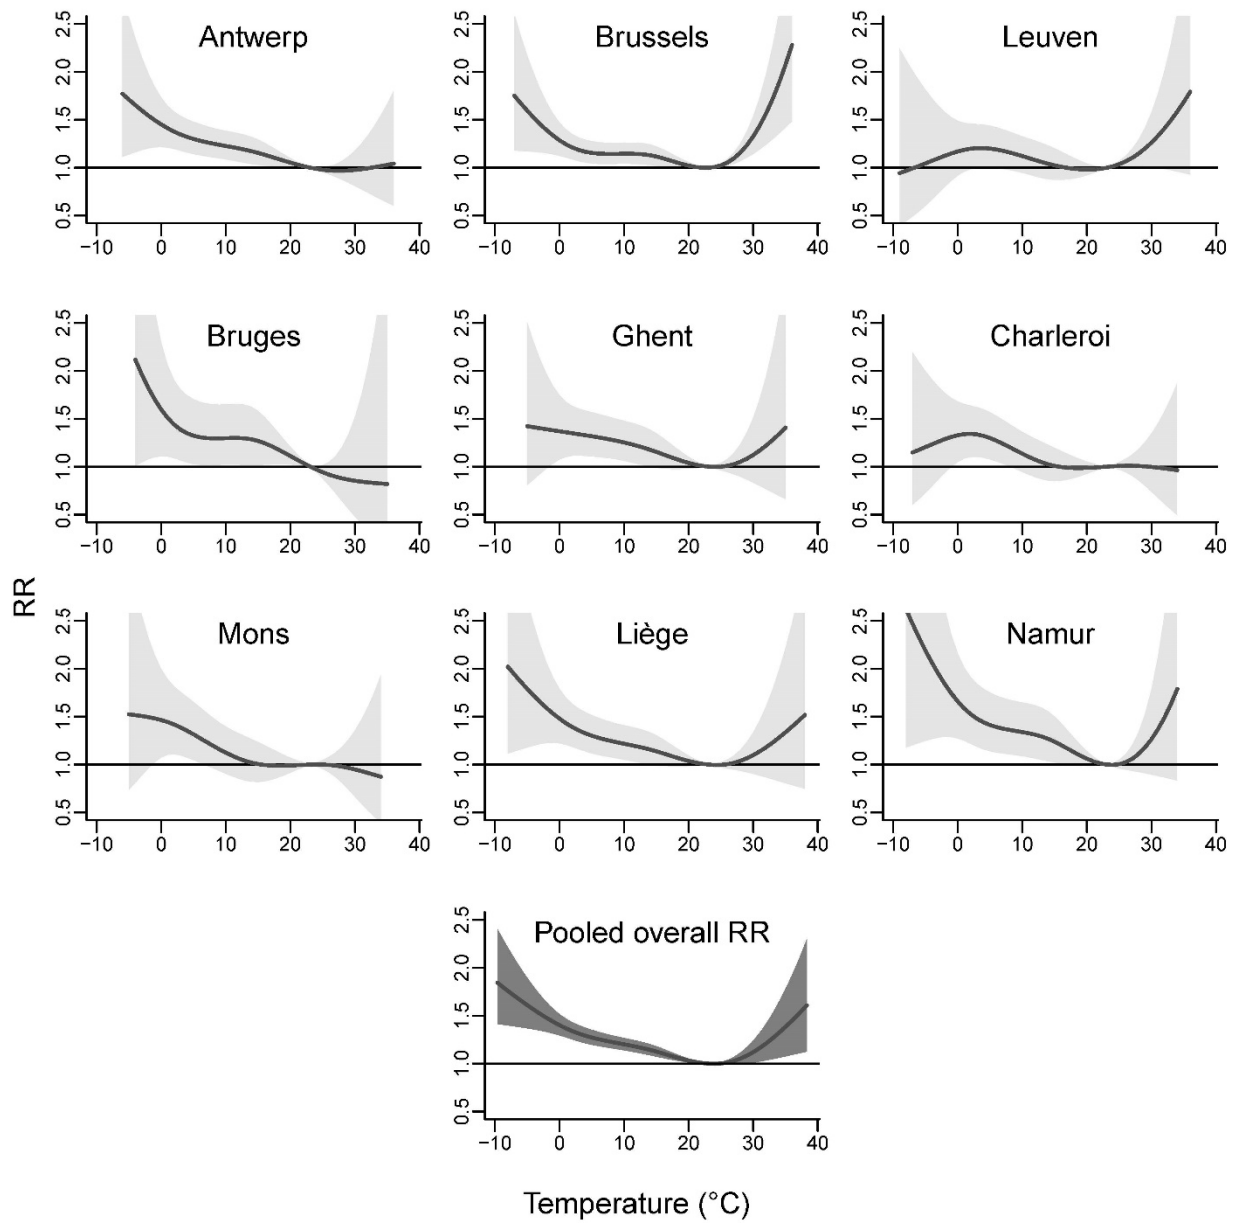

Figure S3. Agglomeration-specific and pooled overall temperature-mortality associations cumulated over lags of 0-28 days, 2010-2015

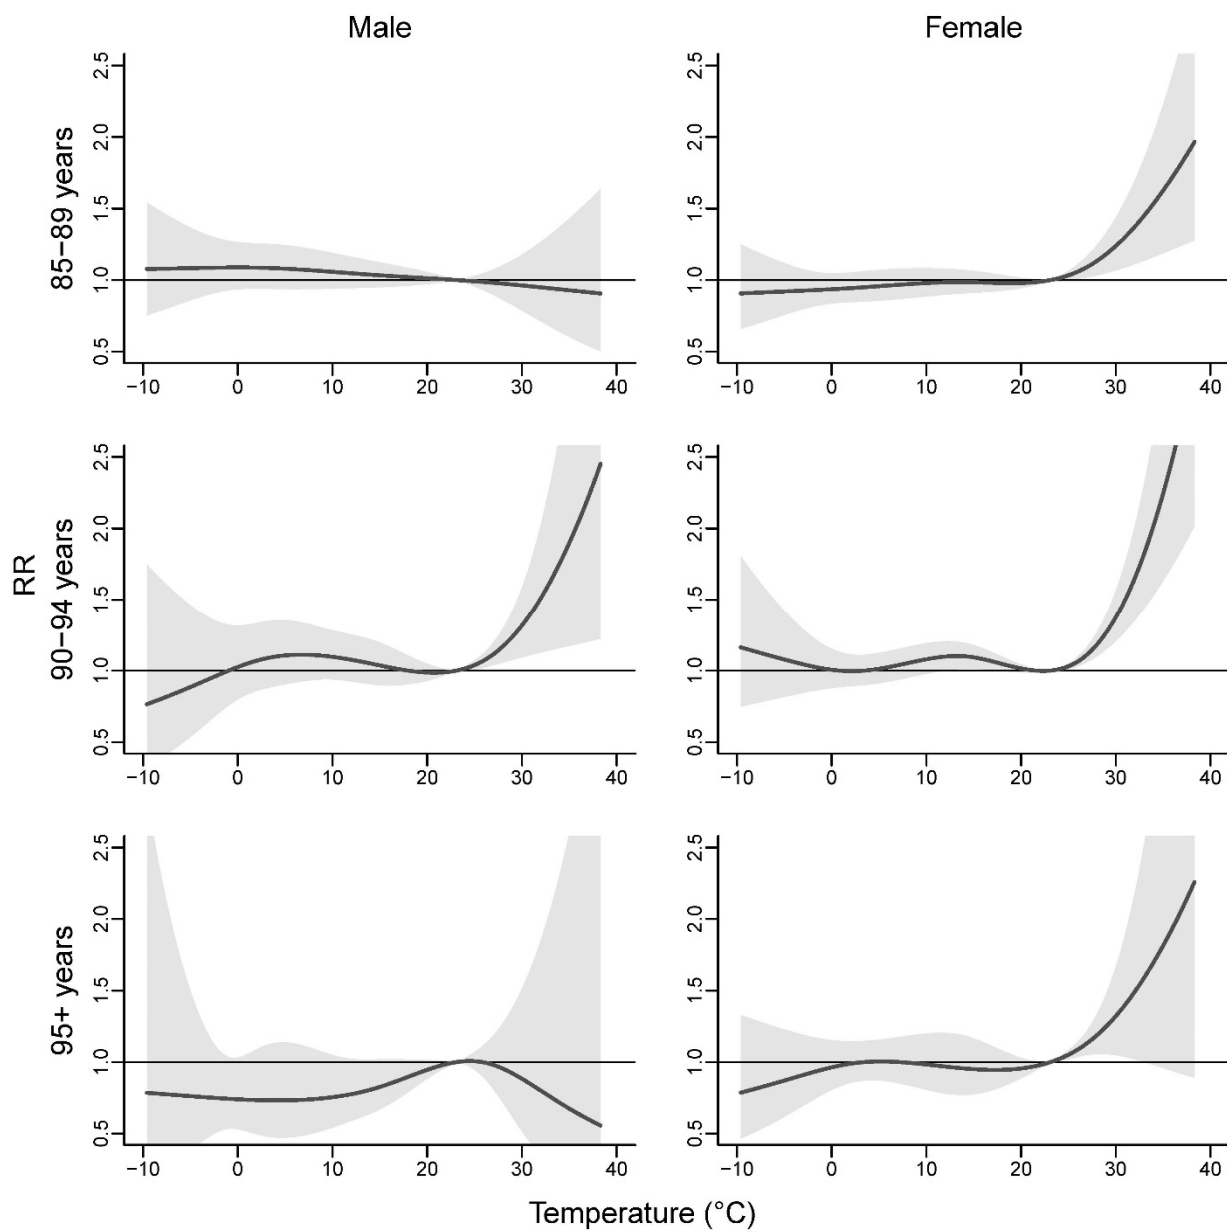

Figure S4. Pooled overall cumulative temperature-mortality associations by sex in people  $\geq 85$  years, cumulated over lags of 0-7 days, 2010-2015
